# Supplementary material for: Transdermal delivery of Chinese herbal medicine extract using dissolvable microneedles for hypertrophic scar treatment
Source: PubMed Central journal article supplement — Acta Pharm Sin B. 2021 Apr 30;11(9):2937–44. doi: 10.1016/j.apsb.2021.03.016 (PMC8463281; doi:10.1016/j.apsb.2021.03.016), 2021-04-30
Supplement: mmc1.pdf [file mmc1.pdf]

**Supplementary Information for**

**ORIGINAL ARTICLE**

**Transdermal delivery of Chinese herbal medicine extracts using dissolvable microneedles for hypertrophic scar treatment**

Xiaoyu Ning<sup>a,b</sup>, Christian Wiraja<sup>b</sup>, Sharon Chew Wan Ting<sup>a,b</sup>, Chen Fan<sup>c</sup>, Chenjie Xu<sup>a,b,d,\*</sup>

<sup>a</sup>*NTU Institute for Health Technologies, Interdisciplinary Graduate Group, Nanyang Technological University, city 639798, Singapore*

<sup>b</sup>*School of Chemical and Biomedical Engineering, Nanyang Technological University, Singapore 637459*

<sup>c</sup>*Skin Research Institute of Singapore, 8A Biomedical Grove, Singapore 138648*

<sup>d</sup>*Department of Biomedical Engineering, City University of Hong Kong, Hong Kong SAR, China*

Received 26 November 2020; received in revised form 15 January 2021; accepted 6 February 2021

\*Corresponding author. Tel.: +852 34424169.

E-mail address: [chenjie.xu@cityu.edu.hk](mailto:chenjie.xu@cityu.edu.hk) (Chenjie Xu).

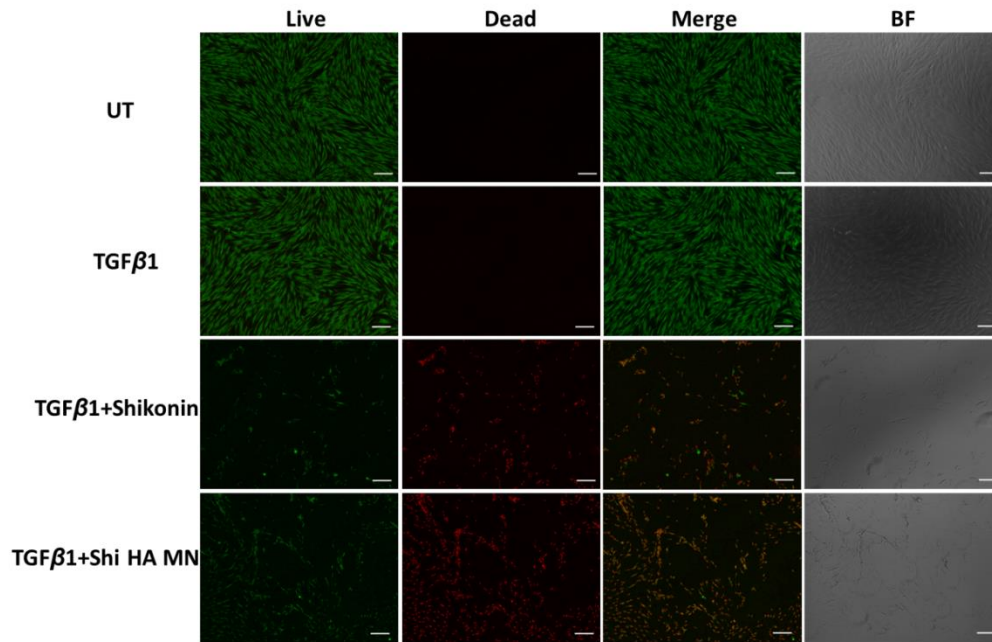

**Figure S1** Microscopic fluorescence (Live/Dead staining) and BF images of HSF treated by different groups after 48 h of incubation. Scale bar: 200  $\mu$ m.

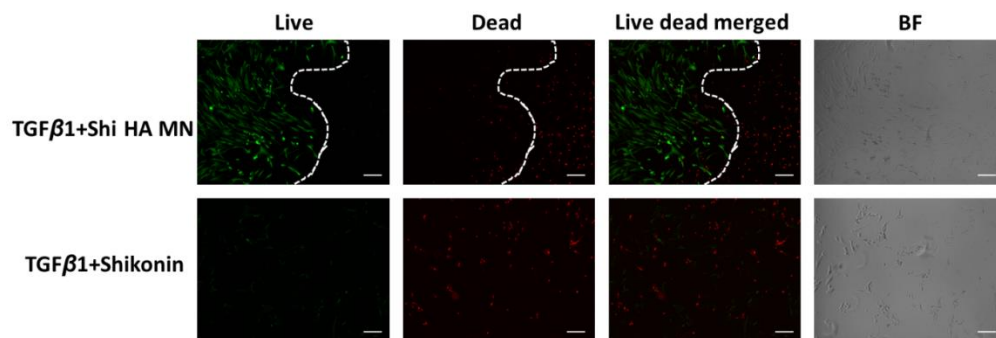

**Figure S2** Live dead staining of HSFs at corner region after 48 h treatment by Shikonin HA MN or Shikonin solution. The image taken for the Shikonin HA MNs group showed a boundary between viable and dead cells (white dashed line), indicating a localizing killing effect of the MNs. Scale bar: 200  $\mu$ m.

**Table S1** Primers used in RT-qPCR.

| Gene                          | Primer sequences: forward (F) & reverse (R)                    |
|-------------------------------|----------------------------------------------------------------|
| <i>TGF<math>\beta</math>1</i> | F: 5'-GTACCTGAACCCGTGTTGCT-3'<br>R: 5'-GAACCCGTTGATGTCCACTT-3' |

---

|               |                                 |
|---------------|---------------------------------|
| <i>FAP-α</i>  | F: 5'-CGGCCCAAGGCATCCCCATTT-3'  |
|               | R: 5'-CACTCTGACTGCAGGGACCACC-3' |
| <i>COL1A1</i> | F: 5'-GAGGGCCAAGACGAAGACATC-3'  |
|               | R: 5'-CAGATCACGTCATCGCACAAC-3'  |

---
